# Supplementary material for: Facile self-assembly synthesis of titanate/Fe3O4nanocomposites for the efficient removal of Pb2+from aqueous systems
Source: Royal Society of Chemistry journal article supplement (doi:10.1039/c2ta00099g), 2012-10-24
Supplement: c2ta00099g.pdf [file c2ta00099g.pdf]

## Electronic Supplementary Information

### Facile self-assembly synthesis of titanate/Fe<sub>3</sub>O<sub>4</sub> nanocomposites for the efficient removal of Pb<sup>2+</sup> from aqueous systems

Fei Liu, Yinjia Jin, Hanbin Liao, Li Cai, Meiping Tong and Yanglong Hou

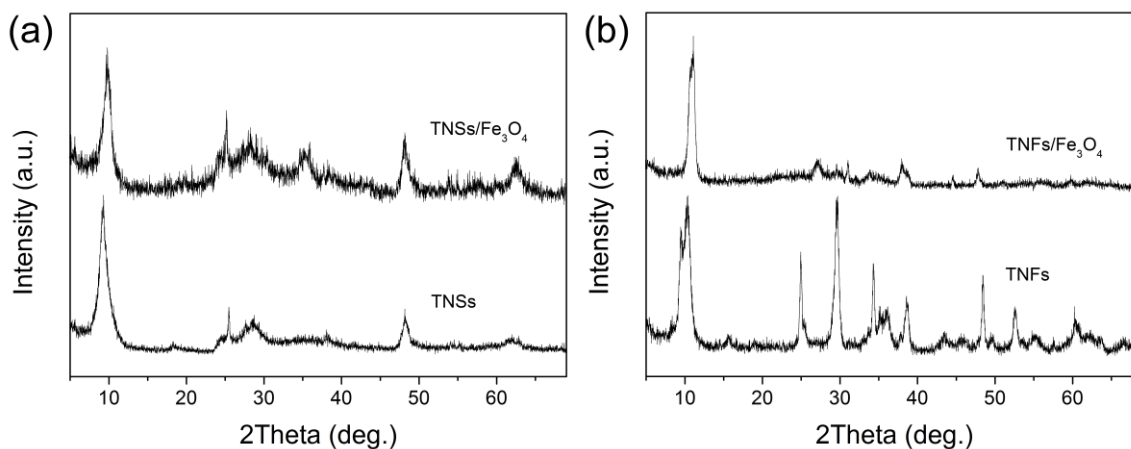

**Fig. S1.** XRD patterns of (a) TNSs and TNSs/Fe<sub>3</sub>O<sub>4</sub>; (b) TNFs and TNFs/Fe<sub>3</sub>O<sub>4</sub>.

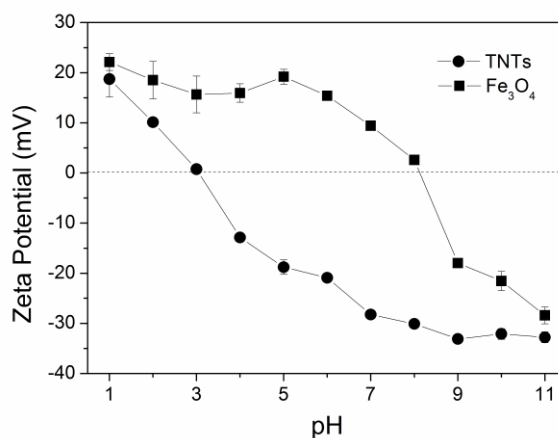

**Fig. S2.** Zeta potentials of TNTs and Fe<sub>3</sub>O<sub>4</sub> NPs in aqueous solutions at different pH values.

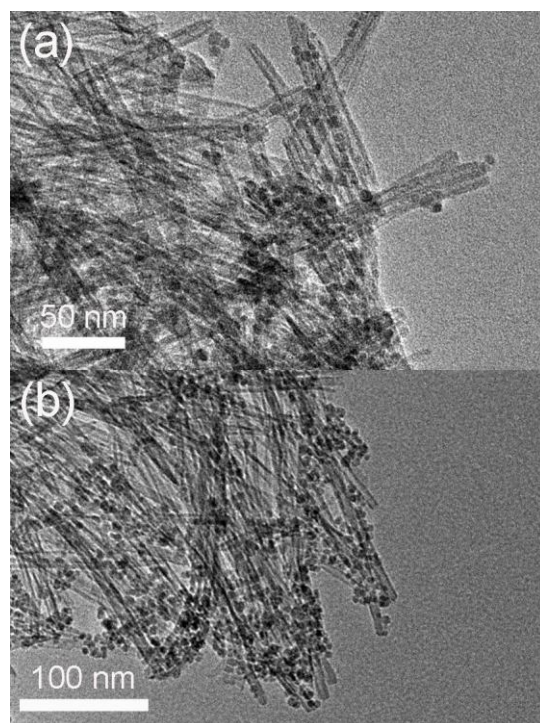

**Fig. S3.** TEM images of TNTs/Fe<sub>3</sub>O<sub>4</sub> nanocomposites with different content of Fe<sub>3</sub>O<sub>4</sub> NPs. (a) 10  $\mu$ L and (b) 30  $\mu$ L of Fe<sub>3</sub>O<sub>4</sub> NPs solutions were separately added into different vials containing 12 mL deionized water and 5 mg TNTs.

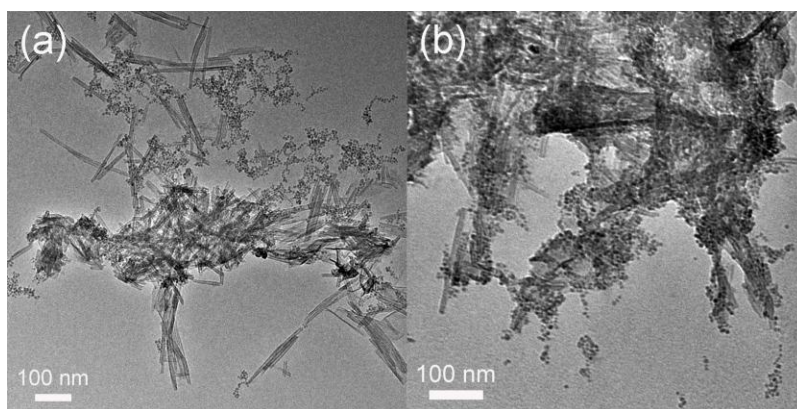

**Fig. S4.** TEM images of the original TNTs/Fe<sub>3</sub>O<sub>4</sub> nanocomposites (a) before and (b) after Na<sub>2</sub>CO<sub>3</sub> treatment.

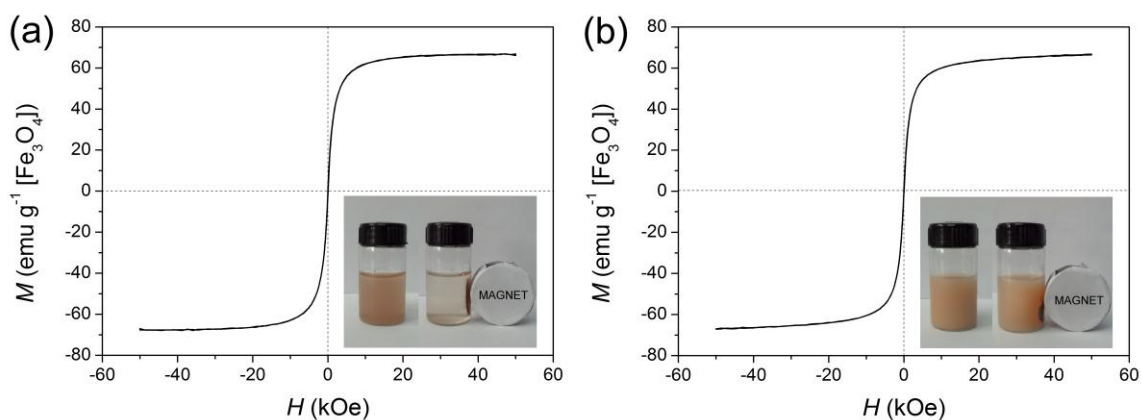

**Fig. S5.** Room temperature hysteresis loop of (a) TNSs/Fe<sub>3</sub>O<sub>4</sub> and (b) TNFs/Fe<sub>3</sub>O<sub>4</sub>. The insets respectively show the water suspensions of the magnetic nanocomposites before and after magnetic separation.

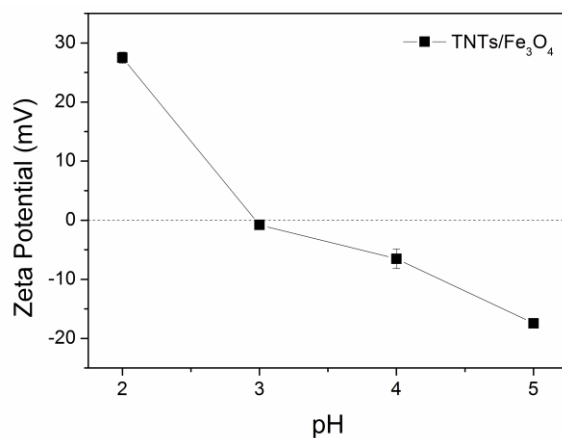

**Fig. S6.** Zeta potential of TNTs/Fe<sub>3</sub>O<sub>4</sub> in aqueous solutions at different pH values.

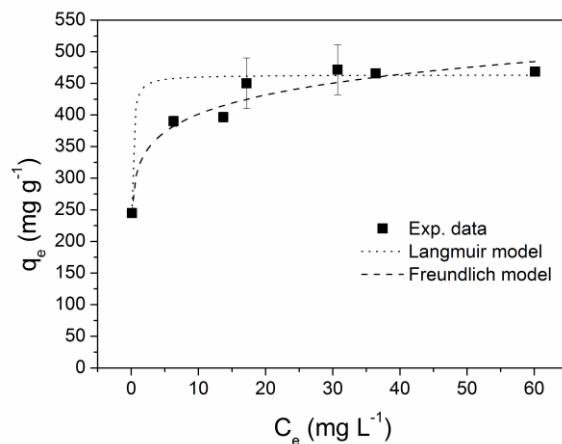

**Fig. S7.** Adsorption isotherm of Pb<sup>2+</sup> on TNTs without coating Fe<sub>3</sub>O<sub>4</sub> nanoparticles. (Materials dosage: 0.1 g L<sup>-1</sup>, solution volume: 20 mL, pH: 5.0 and temperature: 25°C.)

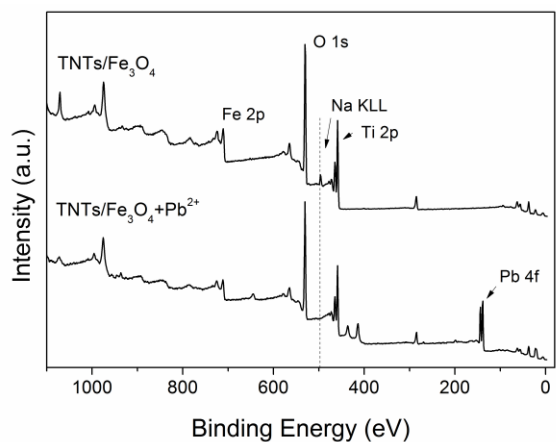

**Fig. S8.** XPS survey spectra of the TNTs/Fe<sub>3</sub>O<sub>4</sub> nanocomposites before and after Pb<sup>2+</sup> removal.

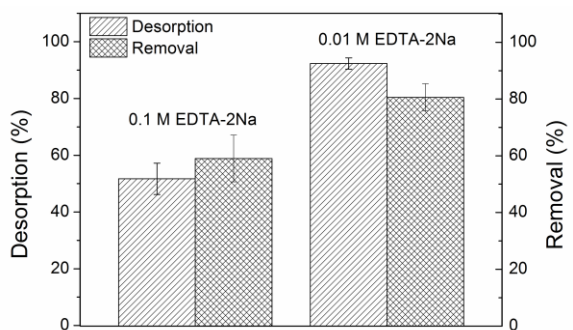

**Fig. S9.** Desorption of Pb<sup>2+</sup> by EDTA-2Na with different concentration (0.01 M and 0.1M) and Pb<sup>2+</sup> adsorption by regenerated adsorbents.

**Table S1.** pH values before and after adsorption. (Materials dosage: 0.1 g L<sup>-1</sup>, solution volume: 20 mL, initial Pb<sup>2+</sup> concentration: 40 mg L<sup>-1</sup>, temperature: 25°C and contact time: 240 min.)

|                   | pH values |      |      |      |
|-------------------|-----------|------|------|------|
| Before adsorption | 2.03      | 3.04 | 4.03 | 4.93 |
| After adsorption  | 2.04      | 3.04 | 3.74 | 4.31 |

**Table S2.** Theoretical and Calculated  $q_e$  Values, Pseudo-Second-Order Rate Constants,  $k_2$ , and Correlation Coefficient Values ( $R^2$ ). (Materials dosage: 0.1 g L<sup>-1</sup>, solution volume: 50 mL, initial metal ion concentration: 20, 60 and 100 mg L<sup>-1</sup>, pH: 5.0 and temperature: 25°C.)

| Theoretical $q_e$ (mg g <sup>-1</sup> ) | Calculated $q_e$ (mg g <sup>-1</sup> ) | $k_2$ (g mg <sup>-1</sup> min <sup>-1</sup> ) | $R^2$  |
|-----------------------------------------|----------------------------------------|-----------------------------------------------|--------|
| 200                                     | 200.00                                 | 1.48                                          | 1      |
| 600                                     | 303.95                                 | 0.0026                                        | 0.9995 |
| 1000                                    | 316.46                                 | 0.0052                                        | 0.9998 |

**Table S3.** Isotherm constants for the adsorption of  $\text{Pb}^{2+}$  by TNTs and TNTs/ $\text{Fe}_3\text{O}_4$ . The equilibrium metal ion concentration,  $C_e$ , the amount of metal ion adsorbed at equilibrium,  $q_e$ , the maximum adsorption capacity of the adsorbent,  $Q$ , the Langmuir constant related to the free energy of adsorption,  $b$ , the Freundlich constant related to the adsorption capacity of the adsorbent,  $K_F$ , the heterogeneity factor indicating the adsorption intensity of the adsorbent,  $n$ , and Correlation Coefficient Values ( $R^2$ ).

| Adsorption isotherm models                                | Isotherm constants           | Adsorbents |                               |
|-----------------------------------------------------------|------------------------------|------------|-------------------------------|
|                                                           |                              | TNTs       | TNTs/ $\text{Fe}_3\text{O}_4$ |
| Langmuir isotherm model<br>$q_e = \frac{QbC_e}{1 + bC_e}$ | $Q$ ( $\text{mg g}^{-1}$ )   | 463.66     | 382.30                        |
|                                                           | $b$ ( $\text{L mg}^{-1}$ )   | 12.261     | 0.647                         |
|                                                           | $R^2$                        | 0.99305    | 0.98539                       |
| Freundlich isotherm model<br>$q_e = K_F C_e^{1/n}$        | $K_F$ ( $\text{mg g}^{-1}$ ) | 315.11     | 275.80                        |
|                                                           | $n$                          | 9.52       | 13.44                         |
|                                                           | $R^2$                        | 0.99731    | 0.97041                       |

**Preparation of titanate nanostructures and  $\text{Fe}_3\text{O}_4$  nanoparticles.** For the synthesis of titanate nanotubes, 3 g titanium dioxide were mixed with 10 M NaOH solution and placed into a Teflon-lined autoclave. After vigorously stirring for 1h, the mixture was sealed and hydrothermally treated at  $130^\circ\text{C}$  for 24h. The precipitation was separated by filtration and washed thoroughly with deionized water until a pH value was reached about 8.0. After filtration, the products were oven-dried at vacuum at  $70^\circ\text{C}$  overnight. Titanate nanofibers and nanosheets were obtained by simply adjust the hydrothermal conditions. For titanate nanofibers, the temperature was changed to  $180^\circ\text{C}$ , while for titanate nanosheets, 5 M NaOH was used for synthesis.

Water-soluble  $\text{Fe}_3\text{O}_4$  NPs were prepared by a thermal decomposition method. In a typical synthesis, 2 mmol  $\text{Fe}(\text{acac})_3$  and 30ml TREG (triethylene glycol) were mixed and slowly heated to  $278^\circ\text{C}$  at a rate of  $3^\circ\text{C}/\text{min}$  under  $\text{N}_2$  protection. The mixture was kept at reflux for 30min before it was cooled down to room temperature. After ethyl acetate was added to the black colloid suspensions, the products were collected by centrifugation at 20,000 rpm. The precipitations were transformed into ethyl acetate to form homogeneous suspensions after ultrasonication and separated by a magnet. After washing with ethyl acetate for three times, the precipitations were re-dispersed into water and stored at  $4^\circ\text{C}$  for further use.
